# Supplementary material for: Enhanced luminescence of tris(carboxylato)uranyl(vi) complexes and energy transfer to Eu(iii): a combined spectroscopic and theoretical investigation
Source: Royal Society of Chemistry journal article supplement (doi:10.1039/d2dt00849a), 2022-01-01
Supplement: d2dt00849a1.pdf [file d2dt00849a1.pdf]

## Supporting Information

### Enhanced luminescence of tris(carboxylato)uranyl(VI) complexes and energy transfer to Eu(III) : A combined spectroscopic and theoretical investigation

Satendra Kumar<sup>1,2</sup>, S. Maji<sup>1</sup>, K. Sundararajan<sup>1,2</sup>

<sup>1</sup> Materials Chemistry and Metal Fuel Cycle Group, Indira Gandhi Centre for Atomic Research Kalpakkam 603 102, India

<sup>2</sup> Homi Bhabha National Institute, Training School Complex, Anushaktinagar, Mumbai 400 094, India

#### Table of contents

| S No | Description                                                                                                                                                                                                                                            | Page |
|------|--------------------------------------------------------------------------------------------------------------------------------------------------------------------------------------------------------------------------------------------------------|------|
| 1    | <b>Figure S1</b> Absorption spectra of uranyl at different uranyl ( $1 \times 10^{-3}$ M) to benzoate ratio                                                                                                                                            | 3    |
| 2    | <b>Figure S2</b> UV-vis titration of uranyl with a gradual increment ( $8 \times 10^{-6}$ M) of nicotinate in acetonitrile. Uranyl- $2 \times 10^{-5}$ M. I = $0.1$ M $\text{Bu}_4\text{N}^+ \text{ClO}_4^-$                                           | 4    |
| 3    | <b>Figure S3</b> UV-vis titration of uranyl with a gradual increment ( $8 \times 10^{-6}$ M) of isonicotinate in acetonitrile. Uranyl- $2 \times 10^{-5}$ M. I = $0.1$ M $\text{Bu}_4\text{N}^+ \text{ClO}_4^-$                                        | 5    |
| 4    | <b>Figure S4</b> Absorption spectra of (a) uranyl ( $1 \times 10^{-4}$ M) (b) ben, (c) nico and (d) isonico. Concentration of each ligand is $1 \times 10^{-4}$ M.                                                                                     | 6    |
| 5    | <b>Figure S5</b> Emission spectra of $[\text{UO}_2(\text{ben})_3]^-$ with the addition of Eu(III). The excitation wavelength is 416 nm for all the cases. $[\text{UO}_2(\text{ben})_3]^-$ - $1 \times 10^{-5}$ M                                       | 7    |
| 6    | <b>Figure S6</b> Emission spectra of $[\text{UO}_2(\text{nic})_3]^-$ and $[\text{UO}_2(\text{isonic})_3]^-$ with the addition of Eu(III). The excitation wavelength is 320 nm for all the cases. $[\text{UO}_2(\text{L})_3]^-$ - $1 \times 10^{-5}$ M. | 8    |
| 7    | <b>Figure S7</b> Bar graph showing the maximum reduction of the luminescence intensity of different $[\text{UO}_2(\text{L})_3]^-$                                                                                                                      | 9    |
| 8    | <b>Figure S8</b> Lifetime of uranyl & Eu(III) in $[\text{UO}_2(\text{ben})_3]^-$ solution (a) and asymmetry ratio of Eu(III) (b) as a function of Eu(III)                                                                                              | 10   |
| 9    | <b>Figure S9</b> Time resolved spectra of $[\text{UO}_2(\text{ben})_3]^-$ in acetonitrile                                                                                                                                                              | 11   |
| 10   | <b>Figure S10</b> Excitation and emission spectra of Eu(III) ( $2 \times 10^{-4}$ M) at different Eu(III) benzoate ratio along with free Eu(III) ( $1 \times 10^{-2}$ M)                                                                               | 12   |
| 11   | <b>Figure S11</b> Asymmetry ratio and life time of Eu(III)-ben complexes at different Eu(III) to ben ratio                                                                                                                                             | 13   |
| 12   | <b>Figure S12</b> Emission spectra of $[\text{UO}_2(\text{ben})_3]^-$ with the addition of Eu(III). The excitation wavelength is 316 nm for all the cases. $[\text{UO}_2(\text{ben})_3]^-$ - $1 \times 10^{-4}$ M                                      | 14   |
| 13   | <b>Figure S13</b> Emission spectra of $[\text{UO}_2(\text{ben})_3]^-$ with the addition of Eu(III). The excitation wavelength is 316 nm for all the cases. $[\text{UO}_2(\text{ben})_3]^-$ - $2 \times 10^{-6}$ M                                      | 15   |

|    |                                                                                                                                           |    |
|----|-------------------------------------------------------------------------------------------------------------------------------------------|----|
| 14 | <b>Figure S14</b> A linear regression analysis of the addition of Eu(III) to uranyl tris complex using 320 nm as an excitation wavelength | 16 |
| 15 | <b>Table S1</b> Coordinates for the optimized geometries of uranyl complexes                                                              | 17 |
| 16 | <b>Table S2</b> Calculated value of complexation energy (kcal/mol) of uranyl complexes in gas and acetonitrile phase                      | 30 |
| 17 | <b>Table S3</b> Calculated value of <b>binding energy</b> (kcal/mol) of ion pair in gas and acetonitrile phase                            | 30 |

### Experimental details:

Fluorescence quantum yield of uranyl complexes was determined in acetonitrile using optically matching solutions of Rhodamine-6G ( $\phi = 0.95$ ) using following equation-

$$\phi_F = \phi_r (A_r F_s / A_s F_r) (\eta_s^2 / \eta_r^2)$$

where  $A_s$  and  $A_r$  are the absorbances of the sample and reference solutions, respectively at the same excitation wavelength,  $F_s$  and  $F_r$  are the corresponding relative integrated fluorescence intensities and  $\eta$  is the refractive index of the solvent used. To avoid re-absorption, the concentrations of the solutions were used such that the absorbance was less than 0.1.

**Figure S1** Absorption spectra of uranyl at different uranyl( $1 \times 10^{-3}$  M) to benzoate ratio.

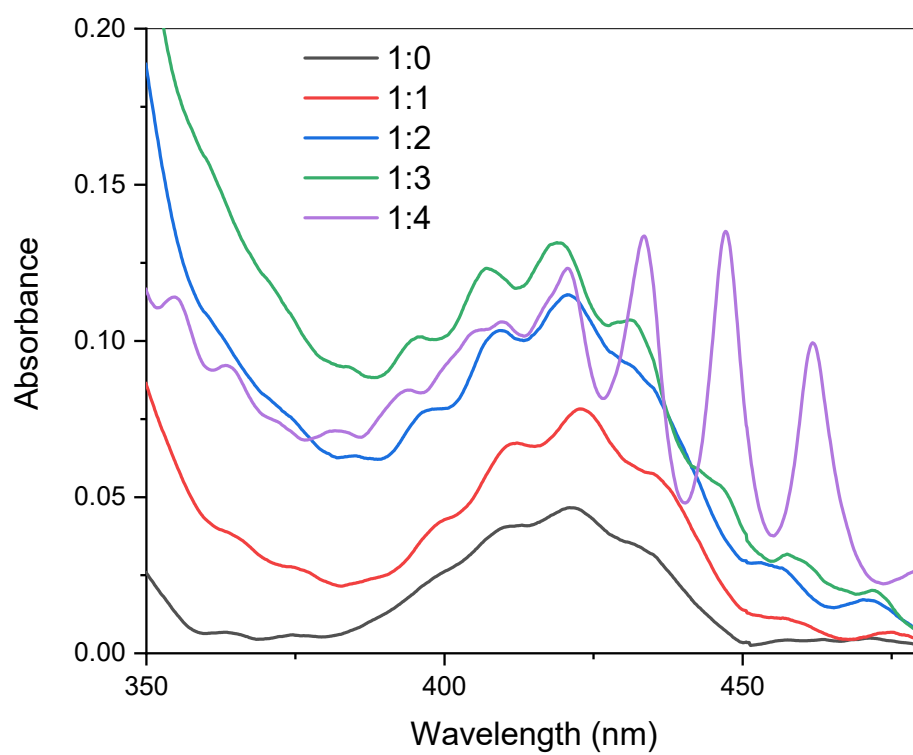

**Figure S2** UV-vis titration of uranyl with a gradual increment ( $8 \times 10^{-6}$  M) of nicotinate in acetonitrile. Uranyl-  $2 \times 10^{-5}$  M. I = 0.1 M  $\text{Bu}_4\text{N}^+ \text{ClO}_4^-$ .

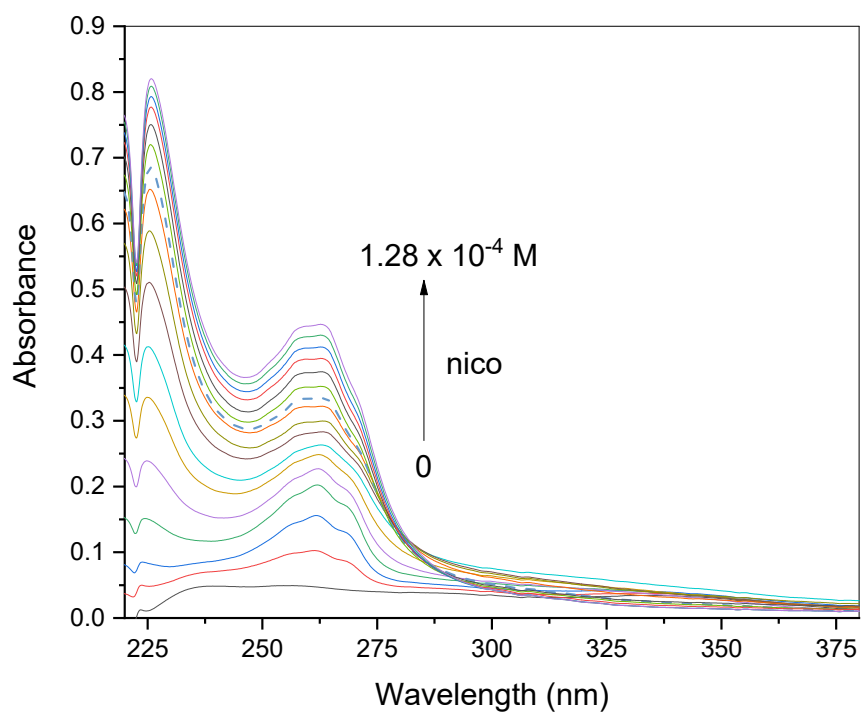

**Figure S3** UV-vis titration of uranyl with a gradual increment ( $8 \times 10^{-6}$  M) of isonicotinate in acetonitrile. Uranyl-  $2 \times 10^{-5}$  M. I = 0.1 M  $\text{Bu}_4\text{N}^+ \text{ClO}_4^-$ .

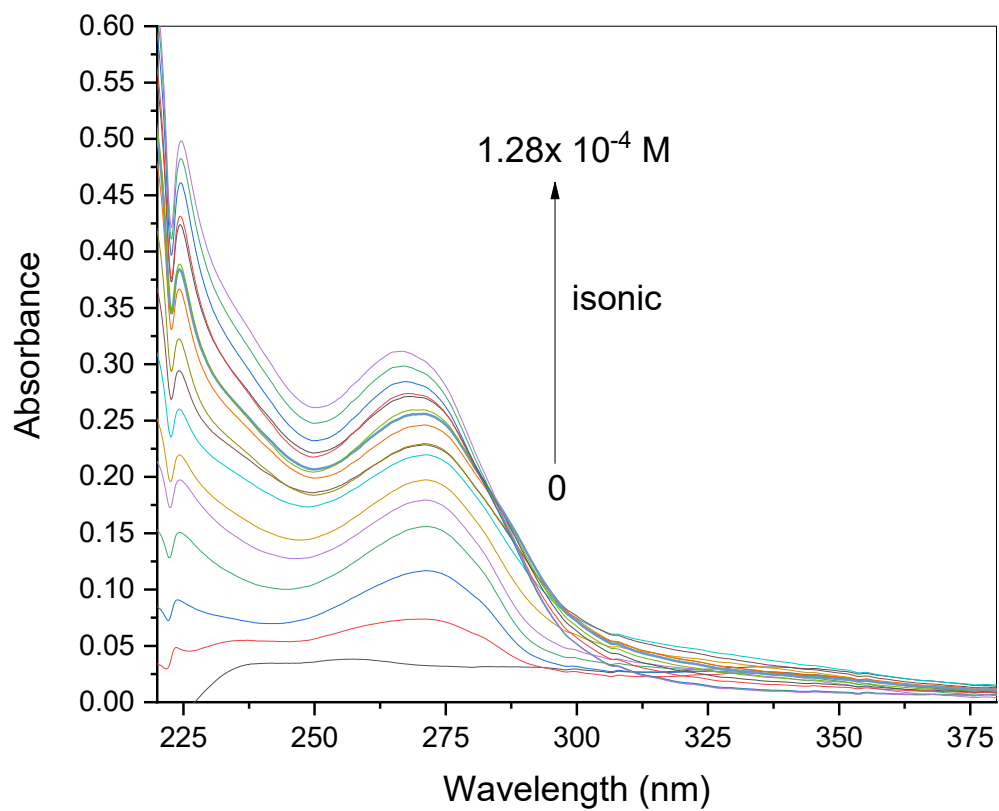

**Figure S4** Absorption spectra of (a) uranyl ( $1 \times 10^{-4}$  M) (b) ben, (c) nico and (d) isonico. Concentration of each ligand is  $1 \times 10^{-4}$  M.

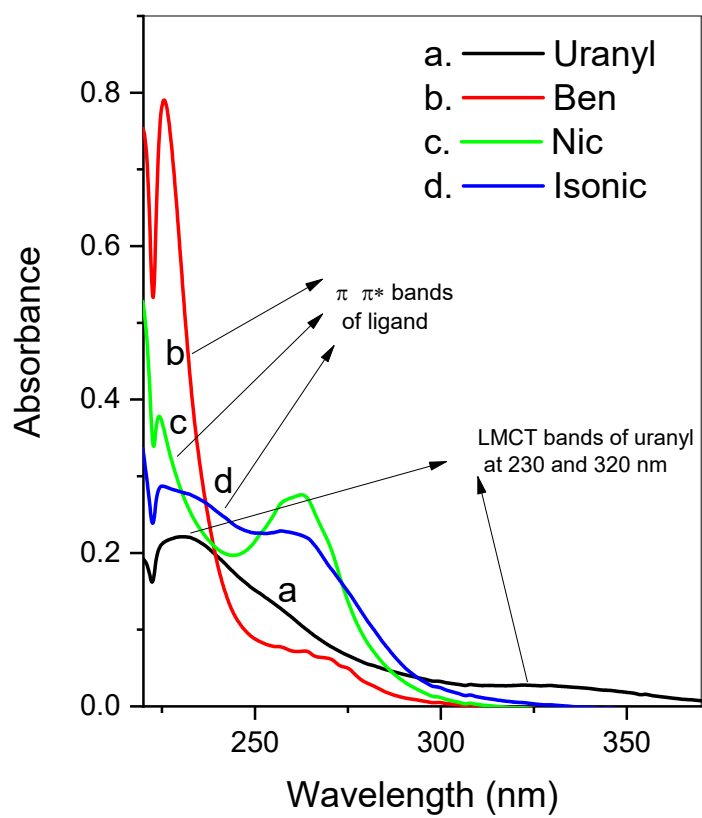

**Figure S5** Emission spectra of  $[\text{UO}_2(\text{ben})_3]^-$  with the addition of Eu(III). The excitation wavelength is 416 nm for all the cases.  $[\text{UO}_2(\text{ben})_3]^- - 1 \times 10^{-5} \text{ M}$ .

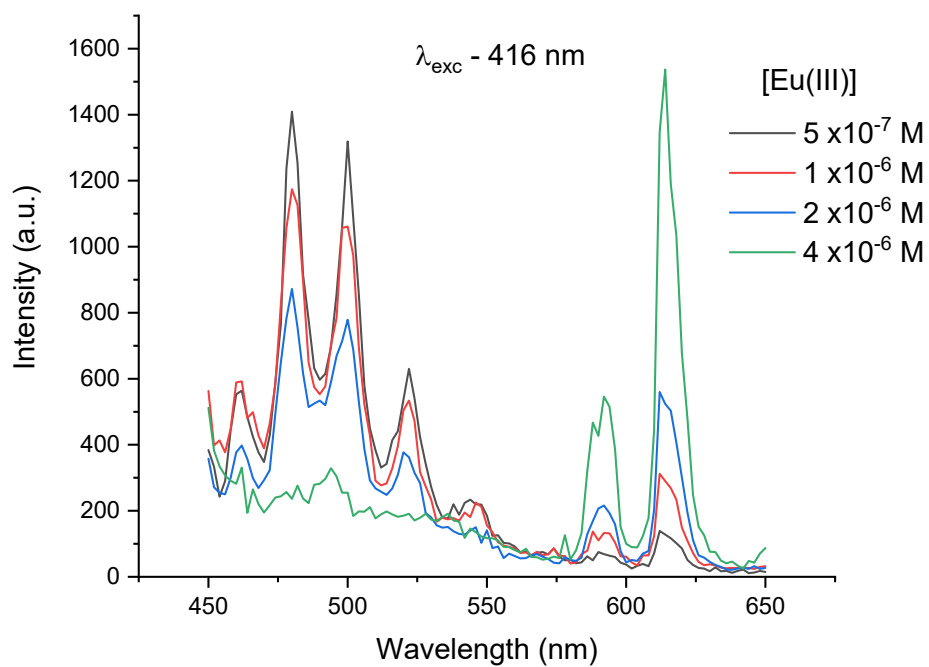

**Figure S6** Emission spectra of  $[\text{UO}_2(\text{nic})_3]^-$  and  $[\text{UO}_2(\text{isonic})_3]^-$  with the addition of Eu(III). The excitation wavelength is 320 nm for all the cases.  $[\text{UO}_2(\text{L})_3]^- - 1 \times 10^{-5} \text{ M}$ .

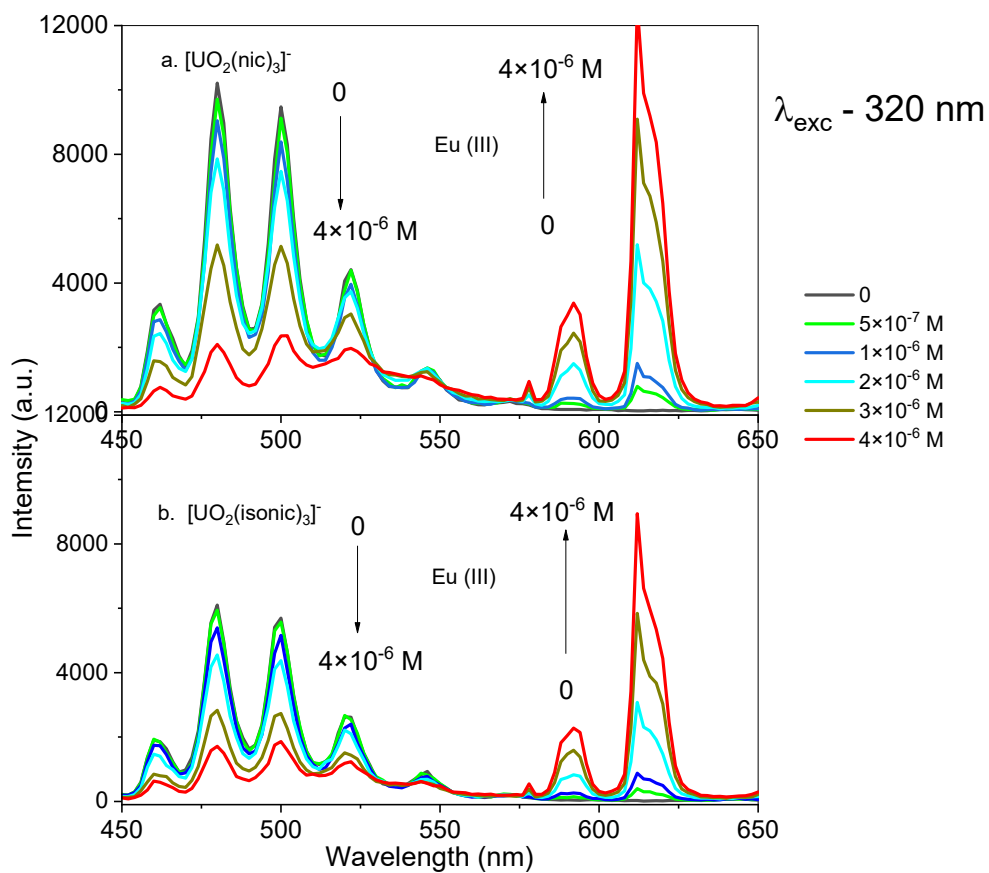



**Figure S7** Bar graph showing the maximum reduction of the luminescence intensity of different  $[\text{UO}_2(\text{L})_3]^-$  ( $1 \times 10^{-5}$  M) in presence of  $\text{Eu}(\text{III})$  ( $4 \times 10^{-6}$  M).

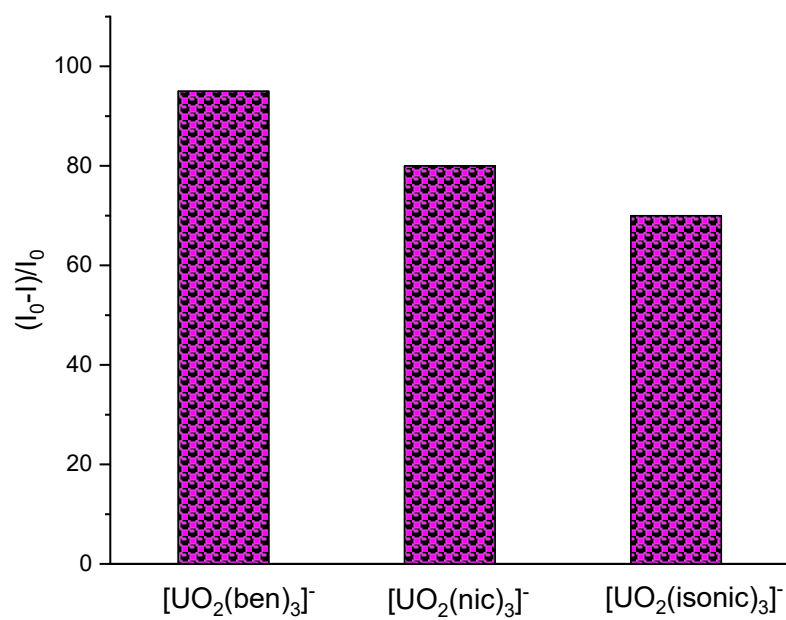

**Figure S8** Lifetime of uranyl&Eu(III) in  $[\text{UO}_2(\text{ben})_3]^-$  solution ( $1 \times 10^{-5}$  M)(a) and asymmetry ratio of Eu(III) (b) as a function of Eu(III)

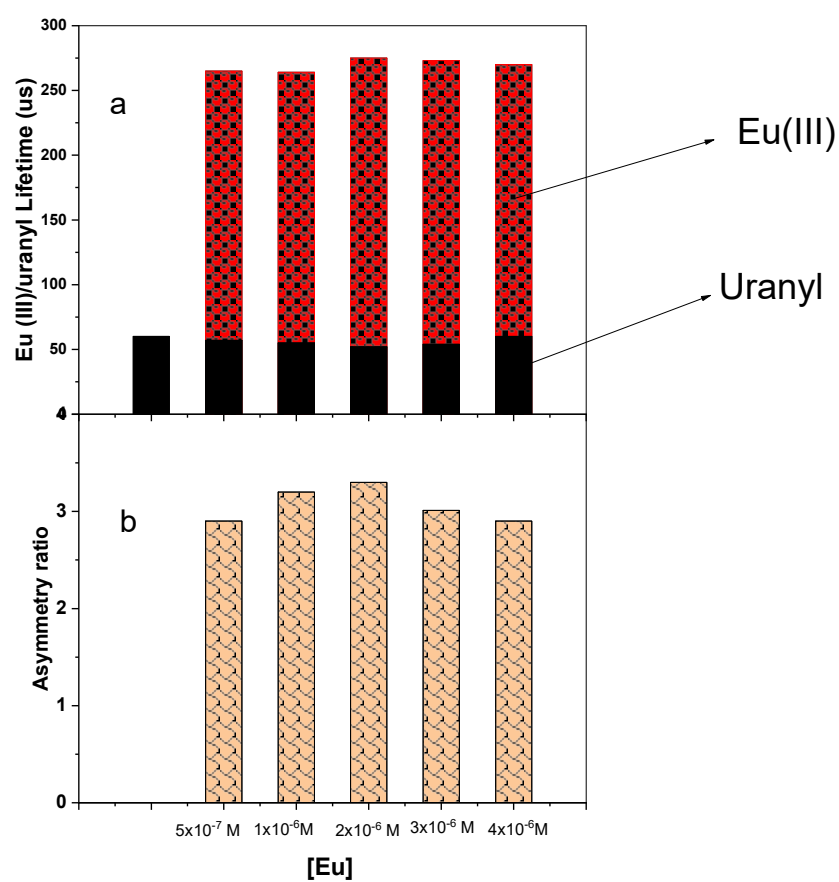

**Figure S9** Time resolved spectra of  $[\text{UO}_2(\text{ben})_3]^-$  in acetonitrile.

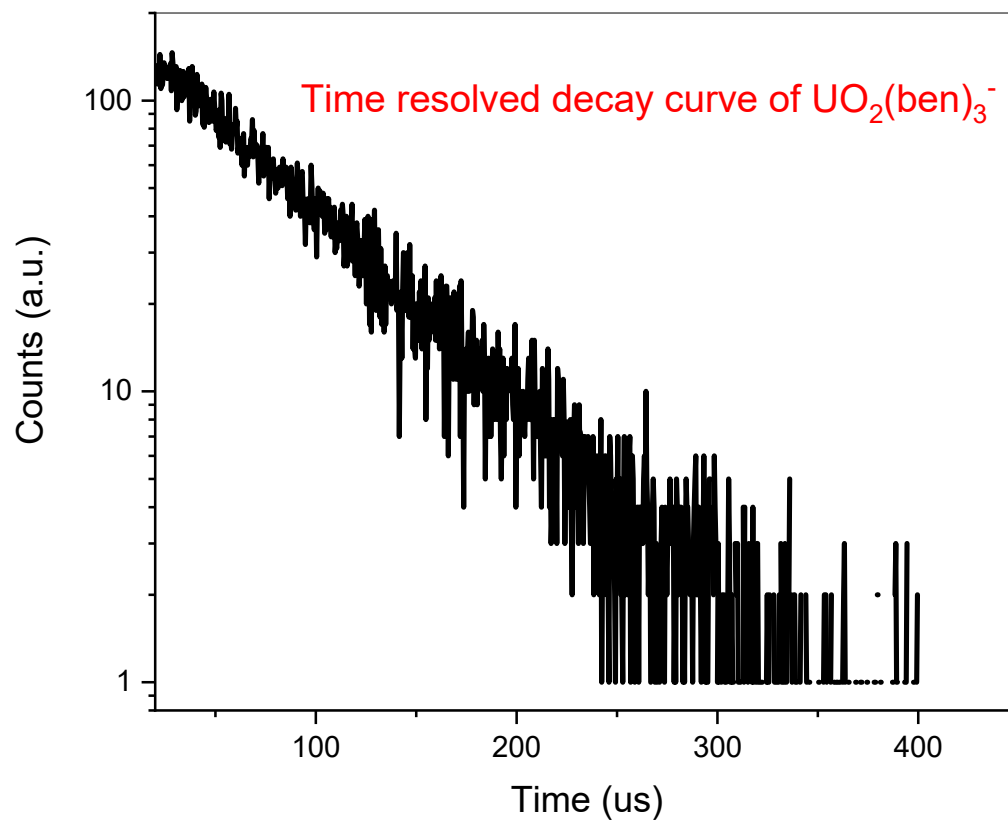

**Figure S10** Excitation and emission spectra of Eu(III) ( $2 \times 10^{-4}$  M) at different Eu(III) to benzoate ratio along with free Eu(III) ( $1 \times 10^{-2}$  M).

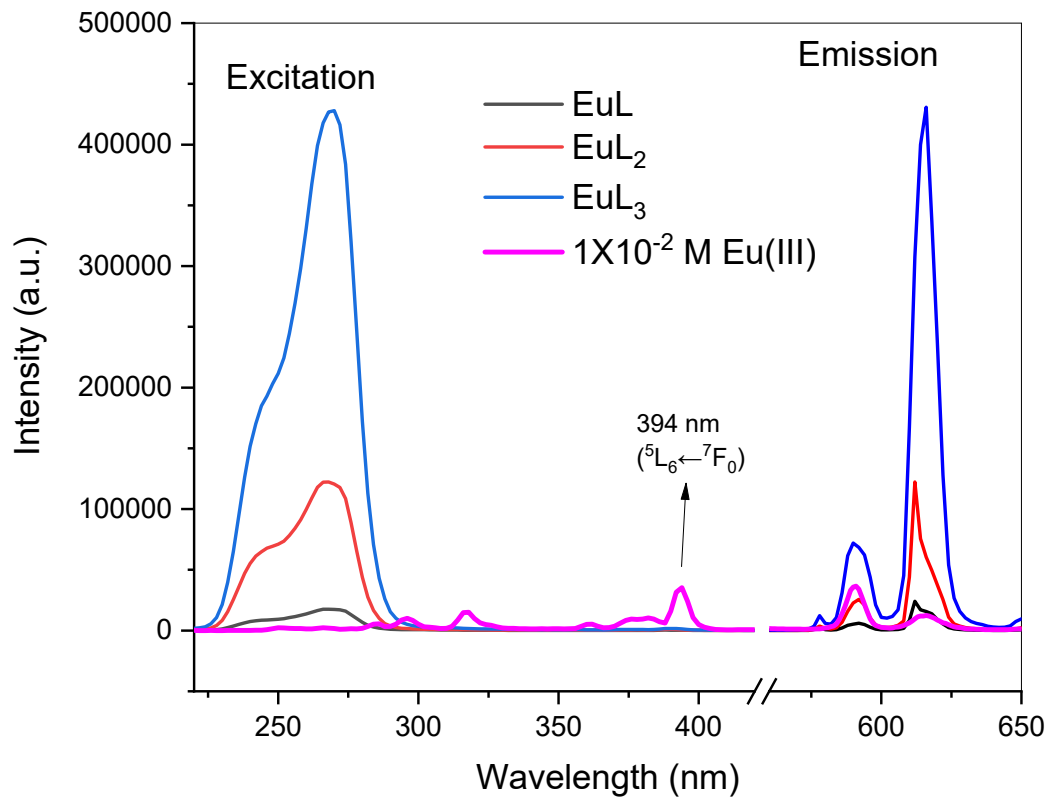

**Figure S11** Asymmetry ratio and life time of Eu(III)-ben complexes (Eu(III)- $2 \times 10^{-4}$  M) at different Eu(III) to benzoate ratio.

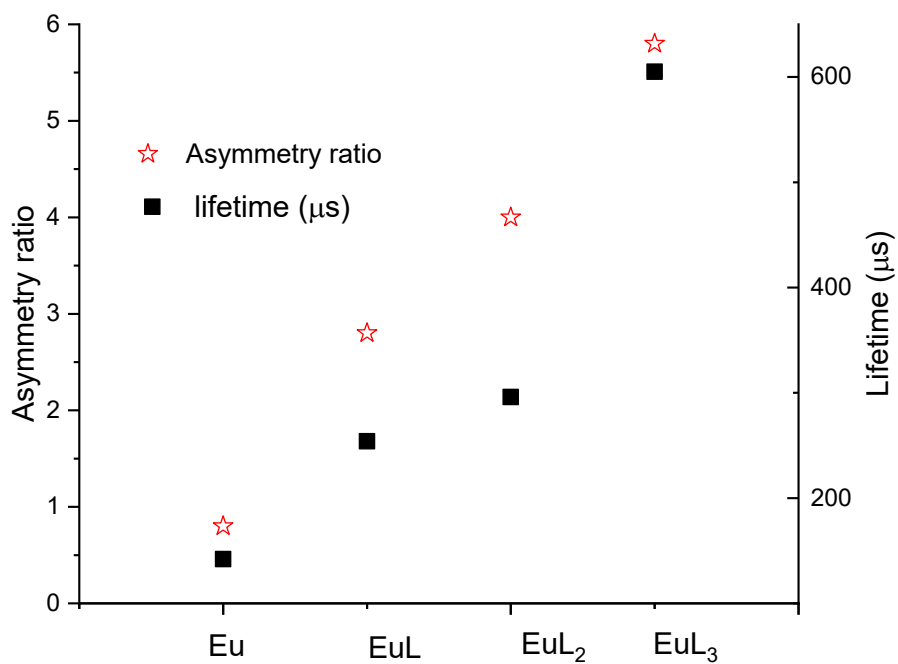

**Figure S12** Emission spectra of  $[\text{UO}_2(\text{ben})_3]^-$  with the addition of  $\text{Eu}(\text{III})$ . The excitation wavelength is 316 nm for all the cases.  $[\text{UO}_2(\text{ben})_3]^- - 1 \times 10^{-4} \text{ M}$ .

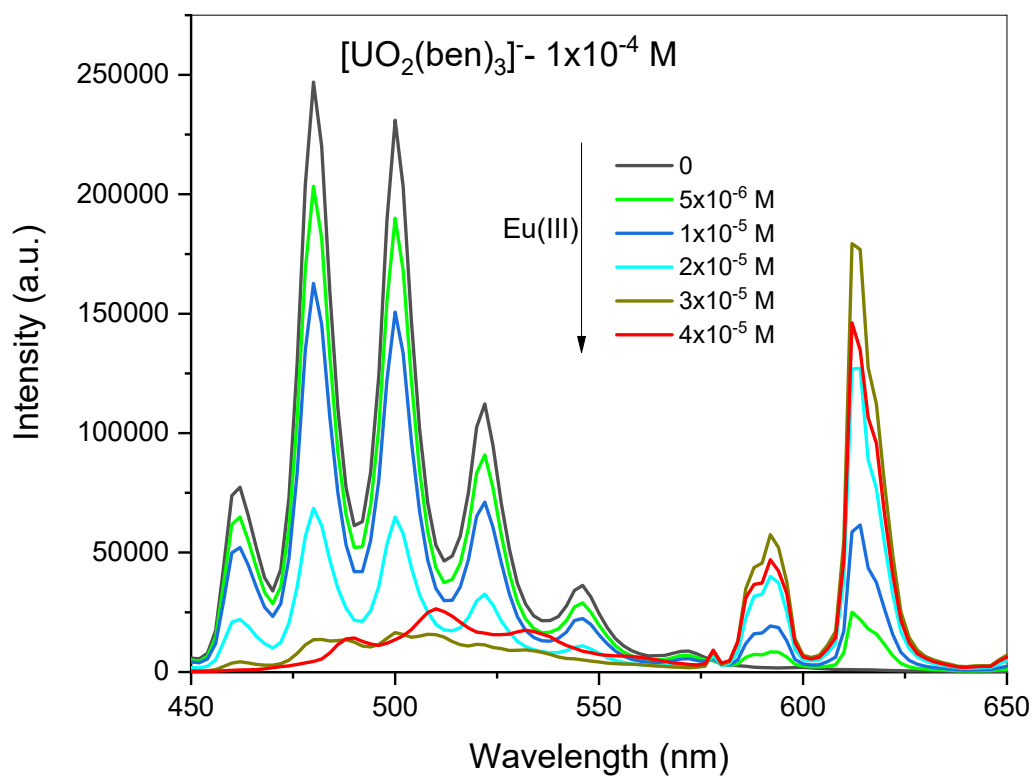

**Figure S13** Emission spectra of  $[\text{UO}_2(\text{ben})_3]^-$  with the addition of Eu(III). The excitation wavelength is 316 nm for all the cases.  $[\text{UO}_2(\text{ben})_3]^- - 2 \times 10^{-6} \text{ M}$ .

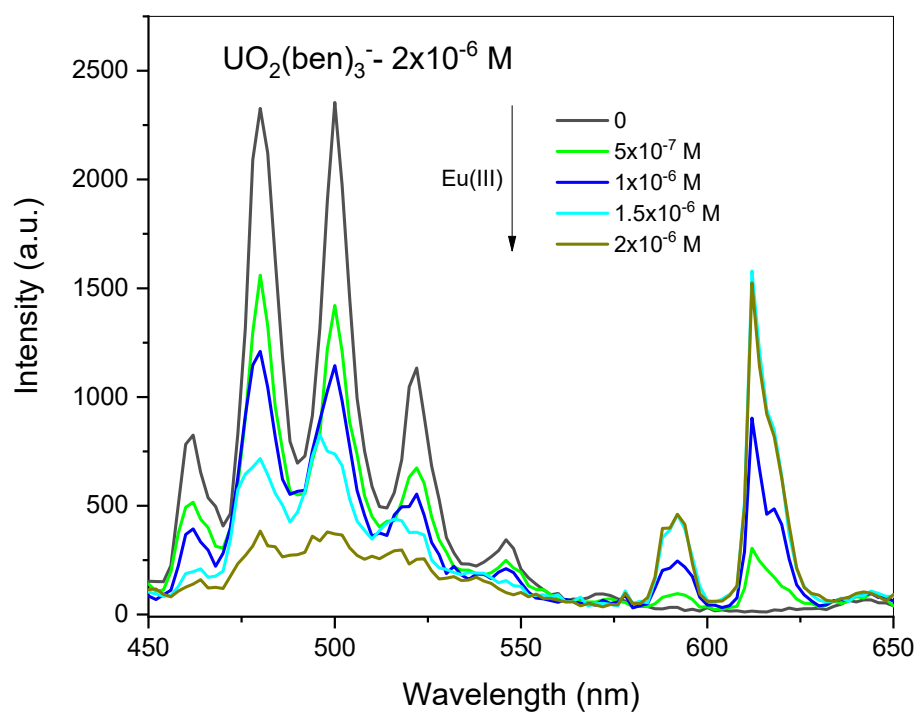

**Figure S14** A linear regression analysis of the addition of Eu(III) to uranylbenzoate tris complex using 320 nm as an excitation wavelength.

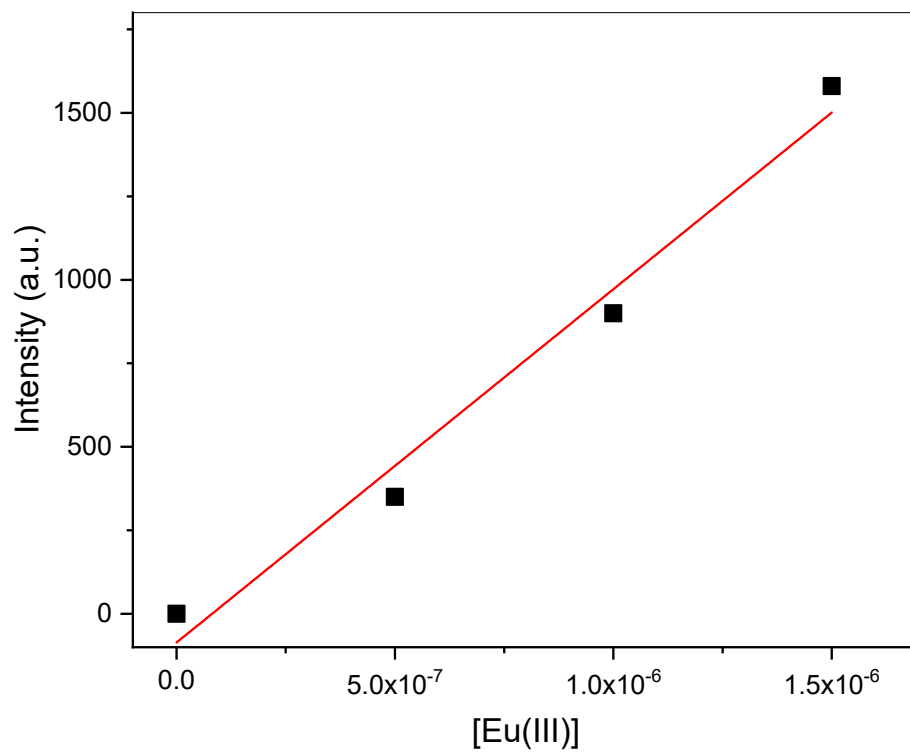



**Table S1** Optimized Coordinates of various uranyl complexes at BP86/ZORA-def2-TZVP/SARC-ZORA-TZVP level of theory

**A. Gaseous phase.**

Input File:

```
%pal nproc 4
  end
! RKS BP86 def2-TZVP def2-TZVP/J TightOpt D3BJ ZORA RIJCOSX
! TightSCF Grid7 NoFinalGrid KDIIS GridX9
%scf
  MaxIter 200
end
%geom
  MaxIter 200
end
%basis newgto 92 "sarc-zora-tzvp" end
```

**[UO<sub>2</sub>(H<sub>2</sub>O)<sub>5</sub>]<sup>2+</sup>**

|    |              |              |              |
|----|--------------|--------------|--------------|
| 92 | -0.191693000 | 0.158473000  | -0.129645000 |
| 8  | -0.821113000 | 0.451845000  | 1.495657000  |
| 8  | 0.442457000  | -0.047989000 | -1.766429000 |
| 8  | 1.826808000  | 1.342225000  | 0.680995000  |
| 1  | 1.927214000  | 1.734421000  | 1.569875000  |
| 1  | 2.658733000  | 1.513844000  | 0.199063000  |
| 8  | 1.521922000  | -1.580598000 | 0.360416000  |
| 1  | 1.738600000  | -2.013386000 | 1.208630000  |
| 1  | 2.124449000  | -1.954288000 | -0.311320000 |
| 8  | -1.370936000 | -2.009510000 | 0.228281000  |
| 1  | -1.871700000 | -2.225104000 | 1.038616000  |
| 1  | -1.440519000 | -2.783495000 | -0.363162000 |
| 8  | -2.377093000 | 0.301351000  | -1.294684000 |
| 1  | -2.490537000 | 0.263651000  | -2.264059000 |

|   |              |             |              |
|---|--------------|-------------|--------------|
| 1 | -3.267750000 | 0.407333000 | -0.908355000 |
| 8 | -0.569236000 | 2.556072000 | -0.600279000 |
| 1 | -0.407103000 | 3.020127000 | -1.444254000 |
| 1 | -0.910351000 | 3.220798000 | 0.028806000  |

**FINAL SINGLE POINT ENERGY -29950.287022573546 Hartree**

**[UO<sub>2</sub>(ben)<sub>3</sub>]<sup>-</sup>**

|    |              |              |              |
|----|--------------|--------------|--------------|
| 92 | 0.150186000  | 0.102540000  | 0.002398000  |
| 8  | 0.152235000  | 0.103159000  | 1.802269000  |
| 8  | 0.148554000  | 0.101995000  | -1.797474000 |
| 8  | -2.357266000 | 0.073101000  | 0.004177000  |
| 6  | -2.440998000 | 1.342985000  | 0.002590000  |
| 8  | -1.398910000 | 2.073584000  | 0.002559000  |
| 8  | 1.378437000  | 2.288082000  | 0.000770000  |
| 6  | 2.520255000  | 1.725977000  | 0.000415000  |
| 8  | 2.632308000  | 0.458276000  | 0.000203000  |
| 8  | 1.429013000  | -2.054332000 | 0.000852000  |
| 6  | 0.371107000  | -2.761761000 | 0.002070000  |
| 8  | -0.782613000 | -2.224526000 | 0.004319000  |
| 6  | 0.486172000  | -4.258026000 | 0.000730000  |
| 6  | -3.794354000 | 1.991434000  | 0.000525000  |
| 6  | 3.758181000  | 2.574276000  | 0.000336000  |
| 6  | 1.747864000  | -4.865710000 | -0.001640000 |
| 6  | 1.854560000  | -6.256911000 | -0.002910000 |
| 6  | 0.700678000  | -7.047691000 | -0.001824000 |
| 6  | -0.560534000 | -6.442618000 | 0.000537000  |

|   |              |              |              |
|---|--------------|--------------|--------------|
| 6 | -0.667784000 | -5.051460000 | 0.001813000  |
| 1 | 2.628402000  | -4.222509000 | -0.002462000 |
| 1 | 2.839102000  | -6.728836000 | -0.004759000 |
| 1 | 0.784396000  | -8.136439000 | -0.002826000 |
| 1 | -1.461358000 | -7.059509000 | 0.001371000  |
| 1 | -1.636307000 | -4.550451000 | 0.003648000  |
| 6 | 3.653048000  | 3.970734000  | 0.000651000  |
| 6 | 4.804205000  | 4.759192000  | 0.000598000  |
| 6 | 6.066219000  | 4.155791000  | 0.000229000  |
| 6 | 6.173373000  | 2.761052000  | -0.000084000 |
| 6 | 5.022533000  | 1.972137000  | -0.000030000 |
| 1 | 2.655577000  | 4.411306000  | 0.000945000  |
| 1 | 4.720199000  | 5.847761000  | 0.000851000  |
| 1 | 6.967003000  | 4.773019000  | 0.000191000  |
| 1 | 7.158222000  | 2.289764000  | -0.000365000 |
| 1 | 5.073323000  | 0.882883000  | -0.000256000 |
| 6 | -4.951444000 | 1.202576000  | 0.000451000  |
| 6 | -6.209625000 | 1.805731000  | -0.001513000 |
| 6 | -6.317566000 | 3.200409000  | -0.003420000 |
| 6 | -5.162979000 | 3.990157000  | -0.003359000 |
| 6 | -3.904557000 | 3.387503000  | -0.001392000 |
| 1 | -4.834632000 | 0.118415000  | 0.001936000  |
| 1 | -7.110582000 | 1.189033000  | -0.001578000 |
| 1 | -7.302326000 | 3.672244000  | -0.004967000 |
| 1 | -5.246854000 | 5.078736000  | -0.004865000 |

1 -2.986419000 3.975784000 -0.001317000

**FINAL SINGLE POINT ENERGY -30830.566998760711 Hartree**

**[UO<sub>2</sub>(nico)<sub>3</sub>]<sup>-</sup>**

92 0.151481000 0.102097000 0.002261000

8 0.154087000 0.102530000 1.800823000

8 0.150057000 0.101789000 -1.796306000

8 -2.353832000 0.059577000 0.004215000

6 -2.444059000 1.328724000 0.002715000

8 -1.410506000 2.068982000 0.002744000

8 1.366807000 2.291471000 0.000820000

6 2.511750000 1.736292000 0.000315000

8 2.637442000 0.471335000 -0.000110000

8 1.440295000 -2.045958000 0.000237000

6 0.386438000 -2.758890000 0.001474000

8 -0.771473000 -2.234070000 0.004004000

6 0.520742000 -4.251794000 -0.000194000

6 -3.804006000 1.959119000 0.000642000

6 3.736490000 2.600510000 0.000333000

6 1.782105000 -4.853362000 -0.002230000

6 1.857189000 -6.244681000 -0.003746000

6 0.667245000 -6.977430000 -0.003206000

7 -0.555425000 -6.420349000 -0.001295000

6 -0.610775000 -5.078503000 0.000186000

1 2.667522000 -4.216562000 -0.002598000

1 2.819446000 -6.759463000 -0.005336000

20

|   |              |              |              |
|---|--------------|--------------|--------------|
| 1 | 0.693683000  | -8.072029000 | -0.004375000 |
| 1 | -1.601269000 | -4.617837000 | 0.001756000  |
| 6 | 3.625185000  | 3.993544000  | 0.000987000  |
| 6 | 4.791713000  | 4.755543000  | 0.001004000  |
| 6 | 6.022024000  | 4.092826000  | 0.000357000  |
| 7 | 6.152445000  | 2.755567000  | -0.000281000 |
| 6 | 5.018855000  | 2.035433000  | -0.000278000 |
| 1 | 2.630507000  | 4.440847000  | 0.001471000  |
| 1 | 4.755125000  | 5.846235000  | 0.001512000  |
| 1 | 6.956083000  | 4.664122000  | 0.000350000  |
| 1 | 5.116408000  | 0.947414000  | -0.000779000 |
| 6 | -4.955766000 | 1.167655000  | 0.000382000  |
| 6 | -6.198135000 | 1.798434000  | -0.001632000 |
| 6 | -6.237586000 | 3.195342000  | -0.003297000 |
| 7 | -5.143722000 | 3.975538000  | -0.003089000 |
| 6 | -3.954043000 | 3.352400000  | -0.001149000 |
| 1 | -4.847052000 | 0.082458000  | 0.001735000  |
| 1 | -7.125190000 | 1.222661000  | -0.001929000 |
| 1 | -7.198708000 | 3.719829000  | -0.004895000 |
| 1 | -3.059797000 | 3.979792000  | -0.000998000 |

**FINAL SINGLE POINT ENERGY -30878.783485082848 Hartree**

**[UO<sub>2</sub>(isonic)<sub>3</sub>]<sup>-</sup>**

|    |             |             |              |
|----|-------------|-------------|--------------|
| 92 | 0.149087000 | 0.102707000 | 0.000131000  |
| 8  | 0.148940000 | 0.102887000 | 1.798049000  |
| 8  | 0.149205000 | 0.102545000 | -1.797790000 |

|   |              |              |              |
|---|--------------|--------------|--------------|
| 8 | -2.357534000 | 0.075327000  | -0.000485000 |
| 6 | -2.436864000 | 1.344035000  | -0.000622000 |
| 8 | -1.399367000 | 2.078122000  | -0.000769000 |
| 8 | 1.378411000  | 2.288463000  | 0.000414000  |
| 6 | 2.516564000  | 1.722515000  | 0.000691000  |
| 8 | 2.633122000  | 0.456868000  | 0.001019000  |
| 8 | 1.428255000  | -2.054242000 | 0.000438000  |
| 6 | 0.369428000  | -2.757488000 | 0.000299000  |
| 8 | -0.785265000 | -2.226309000 | 0.000287000  |
| 6 | 0.485972000  | -4.255674000 | 0.000114000  |
| 6 | -3.792525000 | 1.992328000  | -0.000566000 |
| 6 | 3.756232000  | 2.571824000  | 0.000589000  |
| 6 | 1.737557000  | -4.877409000 | 0.000171000  |
| 6 | 1.790655000  | -6.271335000 | -0.000014000 |
| 7 | 0.704302000  | -7.063496000 | -0.000250000 |
| 6 | -0.491448000 | -6.448791000 | -0.000305000 |
| 6 | -0.654457000 | -5.063415000 | -0.000129000 |
| 1 | 2.639592000  | -4.265326000 | 0.000354000  |
| 1 | 2.756245000  | -6.786548000 | 0.000027000  |
| 1 | -1.365792000 | -7.107073000 | -0.000500000 |
| 1 | -1.640265000 | -4.598123000 | -0.000180000 |
| 6 | 3.669671000  | 3.966644000  | 0.000159000  |
| 6 | 4.850724000  | 4.708914000  | 0.000062000  |
| 7 | 6.079617000  | 4.163477000  | 0.000361000  |
| 6 | 6.144374000  | 2.820536000  | 0.000773000  |

|   |              |             |              |
|---|--------------|-------------|--------------|
| 6 | 5.025632000  | 1.987319000 | 0.000901000  |
| 1 | 2.688846000  | 4.442349000 | -0.000094000 |
| 1 | 4.814745000  | 5.802767000 | -0.000274000 |
| 1 | 7.151390000  | 2.391898000 | 0.001011000  |
| 1 | 5.114959000  | 0.900886000 | 0.001231000  |
| 6 | -4.956873000 | 1.219471000 | -0.000397000 |
| 6 | -6.190493000 | 1.870652000 | -0.000333000 |
| 7 | -6.333134000 | 3.207562000 | -0.000424000 |
| 6 | -5.202792000 | 3.935583000 | -0.000583000 |
| 6 | -3.921608000 | 3.383861000 | -0.000660000 |
| 1 | -4.878001000 | 0.132232000 | -0.000314000 |
| 1 | -7.119567000 | 1.292180000 | -0.000201000 |
| 1 | -5.335540000 | 5.021948000 | -0.000652000 |
| 1 | -3.025643000 | 4.004799000 | -0.000786000 |

**FINAL SINGLE POINT ENERGY -30878.785999300642 Hartree**

### **B. Acetonitrile phase.**

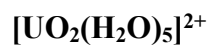

|    |              |              |              |
|----|--------------|--------------|--------------|
| 92 | -0.225284000 | 0.102617000  | -0.165780000 |
| 8  | -0.840158000 | 0.315602000  | 1.490700000  |
| 8  | 0.306168000  | -0.159027000 | -1.844145000 |
| 8  | 1.882260000  | 1.317459000  | 0.346671000  |
| 1  | 1.866690000  | 2.275604000  | 0.527894000  |
| 1  | 2.546155000  | 0.921095000  | 0.941133000  |
| 8  | 1.545086000  | -1.360559000 | 0.666384000  |
| 1  | 1.531180000  | -1.781749000 | 1.546207000  |

|   |              |              |              |
|---|--------------|--------------|--------------|
| 1 | 2.099793000  | -1.926089000 | 0.097002000  |
| 8 | -1.186798000 | -2.113579000 | -0.176684000 |
| 1 | -1.703027000 | -2.523285000 | 0.541491000  |
| 1 | -1.182826000 | -2.743645000 | -0.920562000 |
| 8 | -2.470737000 | 0.449939000  | -0.986854000 |
| 1 | -2.753645000 | 0.420268000  | -1.919215000 |
| 1 | -3.269710000 | 0.606882000  | -0.450956000 |
| 8 | -0.392450000 | 2.508183000  | -0.547924000 |
| 1 | -0.312345000 | 2.930978000  | -1.423288000 |
| 1 | -0.918201000 | 3.115076000  | 0.006078000  |

**FINAL SINGLE POINT ENERGY -29950.588763562198 Hartree**

**[UO<sub>2</sub>(ben)<sub>3</sub>]<sup>-</sup>**

|    |              |              |              |
|----|--------------|--------------|--------------|
| 92 | 0.149942000  | 0.102736000  | 0.002355000  |
| 8  | 0.151679000  | 0.103293000  | 1.815367000  |
| 8  | 0.148382000  | 0.102201000  | -1.810648000 |
| 8  | -2.331001000 | 0.067146000  | 0.003963000  |
| 6  | -2.439023000 | 1.342269000  | 0.002474000  |
| 8  | -1.377796000 | 2.057426000  | 0.002506000  |
| 8  | 1.359833000  | 2.268783000  | 0.000851000  |
| 6  | 2.518149000  | 1.724783000  | 0.000540000  |
| 8  | 2.606894000  | 0.448171000  | 0.000375000  |
| 8  | 1.421037000  | -2.028168000 | 0.000959000  |
| 6  | 0.370747000  | -2.759254000 | 0.002051000  |
| 8  | -0.779178000 | -2.197745000 | 0.004140000  |
| 6  | 0.485032000  | -4.242425000 | 0.000765000  |



|   |              |              |              |
|---|--------------|--------------|--------------|
| 6 | -3.780623000 | 1.984889000  | 0.000517000  |
| 6 | 3.745440000  | 2.565398000  | 0.000420000  |
| 6 | 1.749993000  | -4.849850000 | -0.001072000 |
| 6 | 1.855717000  | -6.240772000 | -0.002373000 |
| 6 | 0.699852000  | -7.030268000 | -0.001830000 |
| 6 | -0.563318000 | -6.427176000 | 0.000014000  |
| 6 | -0.671938000 | -5.036475000 | 0.001309000  |
| 1 | 2.641155000  | -4.222042000 | -0.001390000 |
| 1 | 2.839361000  | -6.712206000 | -0.003800000 |
| 1 | 0.783666000  | -8.118110000 | -0.002862000 |
| 1 | -1.463136000 | -7.043725000 | 0.000430000  |
| 1 | -1.648759000 | -4.552608000 | 0.002639000  |
| 6 | 3.638975000  | 3.964598000  | 0.001066000  |
| 6 | 4.790673000  | 4.751641000  | 0.000904000  |
| 6 | 6.052342000  | 4.145411000  | 0.000109000  |
| 6 | 6.161666000  | 2.749928000  | -0.000531000 |
| 6 | 5.011609000  | 1.960488000  | -0.000377000 |
| 1 | 2.649689000  | 4.422445000  | 0.001775000  |
| 1 | 4.707104000  | 5.839218000  | 0.001411000  |
| 1 | 6.952520000  | 4.761937000  | -0.000026000 |
| 1 | 7.145535000  | 2.278961000  | -0.001150000 |
| 1 | 5.081006000  | 0.872603000  | -0.000970000 |
| 6 | -4.939168000 | 1.193140000  | 0.000828000  |
| 6 | -6.196585000 | 1.797075000  | -0.001106000 |
| 6 | -6.302344000 | 3.192832000  | -0.003343000 |

|   |              |             |              |
|---|--------------|-------------|--------------|
| 6 | -5.148446000 | 3.985198000 | -0.003651000 |
| 6 | -3.889773000 | 3.383882000 | -0.001726000 |
| 1 | -4.841078000 | 0.107466000 | 0.002665000  |
| 1 | -7.096698000 | 1.180955000 | -0.000863000 |
| 1 | -7.286339000 | 3.664190000 | -0.004866000 |
| 1 | -5.232456000 | 5.072739000 | -0.005400000 |
| 1 | -2.982304000 | 3.987876000 | -0.002053000 |

**FINAL SINGLE POINT ENERGY -30830.657743182845 Hartree**

**[UO<sub>2</sub>(nic)<sub>3</sub>]<sup>-</sup>**

|    |              |              |              |
|----|--------------|--------------|--------------|
| 92 | 0.151206000  | 0.102541000  | 0.001679000  |
| 8  | 0.153230000  | 0.102892000  | 1.811768000  |
| 8  | 0.149576000  | 0.102250000  | -1.808417000 |
| 8  | -2.333635000 | 0.042733000  | 0.003458000  |
| 6  | -2.448616000 | 1.315246000  | 0.002221000  |
| 8  | -1.399074000 | 2.044352000  | 0.002354000  |
| 8  | 1.341657000  | 2.283925000  | 0.000281000  |
| 6  | 2.501395000  | 1.747640000  | 0.000006000  |
| 8  | 2.608498000  | 0.474230000  | -0.000345000 |
| 8  | 1.445117000  | -2.019390000 | -0.000262000 |
| 6  | 0.400574000  | -2.755243000 | 0.001035000  |
| 8  | -0.755603000 | -2.210840000 | 0.003456000  |
| 6  | 0.532454000  | -4.237081000 | -0.000328000 |
| 6  | -3.797871000 | 1.941967000  | 0.000496000  |
| 6  | 3.718406000  | 2.603303000  | 0.000258000  |
| 6  | 1.791661000  | -4.848813000 | -0.002853000 |

|   |              |              |              |
|---|--------------|--------------|--------------|
| 6 | 1.856080000  | -6.239541000 | -0.004012000 |
| 6 | 0.661440000  | -6.964683000 | -0.002499000 |
| 7 | -0.558848000 | -6.393831000 | -0.000061000 |
| 6 | -0.607794000 | -5.052782000 | 0.000931000  |
| 1 | 2.693235000  | -4.236079000 | -0.003884000 |
| 1 | 2.813243000  | -6.760728000 | -0.006013000 |
| 1 | 0.681176000  | -8.057549000 | -0.003319000 |
| 1 | -1.599083000 | -4.594062000 | 0.002863000  |
| 6 | 3.617970000  | 3.999631000  | 0.000396000  |
| 6 | 4.789837000  | 4.751302000  | 0.000718000  |
| 6 | 6.015444000  | 4.079827000  | 0.001000000  |
| 7 | 6.131805000  | 2.737650000  | 0.000892000  |
| 6 | 4.995206000  | 2.024236000  | 0.000467000  |
| 1 | 2.636336000  | 4.473626000  | 0.000244000  |
| 1 | 4.762135000  | 5.840814000  | 0.000831000  |
| 1 | 6.951778000  | 4.643764000  | 0.001292000  |
| 1 | 5.094072000  | 0.936435000  | 0.000355000  |
| 6 | -4.957241000 | 1.157311000  | -0.000240000 |
| 6 | -6.193864000 | 1.796868000  | -0.001842000 |
| 6 | -6.224555000 | 3.194028000  | -0.002518000 |
| 7 | -5.120051000 | 3.965419000  | -0.001798000 |
| 6 | -3.934185000 | 3.337298000  | -0.000362000 |
| 1 | -4.877358000 | 0.070161000  | 0.000418000  |
| 1 | -7.123807000 | 1.228529000  | -0.002495000 |
| 1 | -7.180882000 | 3.723351000  | -0.003707000 |

1 -3.041283000 3.966432000 0.000135000

**FINAL SINGLE POINT ENERGY -30878.872408500552 Hartree**

**[UO<sub>2</sub>(isonic)<sub>3</sub>]<sup>-</sup>**

92 0.149376000 0.102677000 0.000233000

8 0.149008000 0.102821000 1.808958000

8 0.149696000 0.102453000 -1.808500000

8 -2.336165000 0.069477000 -0.000379000

6 -2.435335000 1.341892000 -0.000465000

8 -1.381991000 2.062350000 -0.000539000

8 1.363308000 2.272309000 0.000434000

6 2.514776000 1.721949000 0.000725000

8 2.611947000 0.449470000 0.001054000

8 1.421951000 -2.033089000 0.000449000

6 0.369813000 -2.755421000 0.000383000

8 -0.780963000 -2.203725000 0.000433000

6 0.485228000 -4.245022000 0.000178000

6 -3.782927000 1.987026000 -0.000484000

6 3.747371000 2.566302000 0.000616000

6 1.739406000 -4.863909000 -0.000162000

6 1.794082000 -6.257719000 -0.000403000

7 0.702141000 -7.044849000 -0.000359000

6 -0.498003000 -6.435287000 -0.000033000

6 -0.658669000 -5.049687000 0.000264000

1 2.651220000 -4.267714000 -0.000241000

1 2.759565000 -6.769752000 -0.000699000

|   |              |              |              |
|---|--------------|--------------|--------------|
| 1 | -1.373120000 | -7.089889000 | 0.000002000  |
| 1 | -1.651418000 | -4.601015000 | 0.000529000  |
| 6 | 3.656716000  | 3.961926000  | -0.000054000 |
| 6 | 4.836703000  | 4.705788000  | -0.000185000 |
| 7 | 6.064163000  | 4.153295000  | 0.000268000  |
| 6 | 6.135893000  | 2.809135000  | 0.000908000  |
| 6 | 5.015985000  | 1.977568000  | 0.001128000  |
| 1 | 2.684656000  | 4.453811000  | -0.000468000 |
| 1 | 4.797761000  | 5.797951000  | -0.000732000 |
| 1 | 7.140210000  | 2.378227000  | 0.001274000  |
| 1 | 5.123440000  | 0.893451000  | 0.001657000  |
| 6 | -4.946176000 | 1.210602000  | -0.000681000 |
| 6 | -6.180428000 | 1.860465000  | -0.000727000 |
| 7 | -6.315802000 | 3.199711000  | -0.000622000 |
| 6 | -5.187654000 | 3.934010000  | -0.000435000 |
| 6 | -3.907495000 | 3.380034000  | -0.000338000 |
| 1 | -4.886041000 | 0.122837000  | -0.000799000 |
| 1 | -7.106746000 | 1.280578000  | -0.000907000 |
| 1 | -5.316729000 | 5.019216000  | -0.000346000 |
| 1 | -3.022400000 | 4.015223000  | -0.000178000 |

**FINAL SINGLE POINT ENERGY -30878.869653847738 Hartree**

**Table S2** Calculated value of complexation energy (kcal/mol) of free uranyl with L in gas and acetonitrile phase.

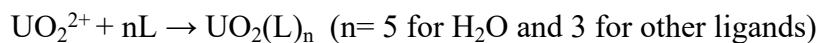

| Uranyl complex                             | Complexation energy(kcal/mol) |              |
|--------------------------------------------|-------------------------------|--------------|
|                                            | Gas phase                     | Acetonitrile |
|                                            |                               |              |
| $[\text{UO}_2(\text{H}_2\text{O})_5]^{2+}$ | - 260.9                       | -135.6       |
| $[\text{UO}_2(\text{ben})_3]^-$            | -616.4                        | -207.6       |
| $[\text{UO}_2(\text{nic})_3]^-$            | -608.7                        | -202.3       |
| $[\text{UO}_2(\text{isonic})_3]^-$         | -605.8                        | -200.1       |

**Table S3** Calculated value of **binding energy** of ion pair (kcal/mol) in gaseous and solution phase,  $\text{Me}_4\text{N}^+\text{L}^- \rightarrow \text{Me}_4\text{N}^+ + \text{L}^-$

| Reaction                                                                                   | Phase        | Energy of $\text{Me}_4\text{N}^+\text{L}^-$<br>(Hartree) | Energy of $\text{Me}_4\text{N}^+$<br>(Hartree) | Energy of ligand<br>(Hartree) | Dissociation energy<br>(kcal/mol) |
|--------------------------------------------------------------------------------------------|--------------|----------------------------------------------------------|------------------------------------------------|-------------------------------|-----------------------------------|
| $\text{Me}_4\text{N}^+\text{ben}^- \rightarrow \text{Me}_4\text{N}^+ + \text{ben}^-$       | Gas phase    | -635.386                                                 | -214.402                                       | -420.826                      | 99.7                              |
|                                                                                            | Acetonitrile | -635.424                                                 | -214.488                                       | -420.926                      | 6.7                               |
| $\text{Me}_4\text{N}^+\text{nico}^- \rightarrow \text{Me}_4\text{N}^+ + \text{nico}^-$     | Gas phase    | -651.458                                                 | -214.402                                       | -436.902                      | 97.1                              |
|                                                                                            | Acetonitrile | -651.498                                                 | -214.488                                       | -437                          | 6.5                               |
| $\text{Me}_4\text{N}^+\text{isonic}^- \rightarrow \text{Me}_4\text{N}^+ + \text{isonic}^-$ | Gas phase    | -651.459                                                 | -214.402                                       | -436.905                      | 95.8                              |
|                                                                                            | Acetonitrile | -651.499                                                 | -214.488                                       | -437                          | 6.4                               |
